# Supplementary material for: Public awareness and perceptions of ocean plastic pollution and support for solutions in the United States
Source: Frontiers journal article supplement (doi:10.3389/fmars.2023.1323477), 2024-01-19
Supplement: Data_Sheet_2.XLSX [file Data_Sheet_2.XLSX]

## Sheet: Sheet1
NAME	TYPE	WIDTH	DECIMALS	LABEL	VALUES	MISSING	COLUMNS	ALIGN	MEASURE	ROLE
StartDate	Date	20	0	Start Date	None	None	8	Right	Scale	Input
EndDate	Date	20	0	End Date	None	None	8	Right	Scale	Input
Status	Numeric	2	0	Response Type	{0, IP Address}...	None	8	Right	Nominal	Input
Progress	Numeric	40	2	Progress	None	None	8	Right	Scale	Input
Duration__in_seconds_	Numeric	40	2	Duration (in seconds)	None	None	8	Right	Scale	Input
Finished	Numeric	1	0	Finished	{0, False}...	None	8	Right	Nominal	Input
RecordedDate	Date	20	0	Recorded Date	None	None	8	Right	Scale	Input
ResponseId	String	17	0	Response ID	None	None	50	Left	Nominal	Input
DistributionChannel	String	9	0	Distribution Channel	None	None	50	Left	Nominal	Input
UserLanguage	String	2	0	User Language	None	None	50	Left	Nominal	Input
Q_RecaptchaScore	Numeric	40	2	Q_RecaptchaScore	None	None	8	Right	Scale	Input
Q_RelevantIDDuplicate	String	4	0	Q_RelevantIDDuplicate	None	None	50	Left	Nominal	Input
Q_RelevantIDDuplicateScore	Numeric	40	2	Q_RelevantIDDuplicateScore	None	None	8	Right	Scale	Input
Q_RelevantIDFraudScore	Numeric	40	2	Q_RelevantIDFraudScore	None	None	8	Right	Scale	Input
Q_RelevantIDLastStartDate	Date	20	0	Q_RelevantIDLastStartDate	None	None	8	Right	Scale	Input
MetaInfo_Browser	String	14	0	Click to write the question text - Browser	None	None	50	Left	Nominal	Input
MetaInfo_Version	String	16	0	Click to write the question text - Version	None	None	50	Left	Nominal	Input
MetaInfo_Operating_System	String	23	0	Click to write the question text - Operating System	None	None	50	Left	Nominal	Input
MetaInfo_Resolution	String	9	0	Click to write the question text - Resolution	None	None	50	Left	Nominal	Input
OC_1_1	Numeric	1	0	How would you describe your relationship to Ocean Conservancy? Select all that apply. - Selected Choice I am a donor	{1, I am a donor}...	None	8	Right	Nominal	Input
OC_1_2	Numeric	1	0	How would you describe your relationship to Ocean Conservancy? Select all that apply. - Selected Choice Made a one-time contribution	{1, Made a one-time contribution}...	None	8	Right	Nominal	Input
OC_1_3	Numeric	1	0	How would you describe your relationship to Ocean Conservancy? Select all that apply. - Selected Choice I am a subscriber	{1, I am a subscriber}...	None	8	Right	Nominal	Input
OC_1_4	Numeric	1	0	How would you describe your relationship to Ocean Conservancy? Select all that apply. - Selected Choice I am a supporter	{1, I am a supporter}...	None	8	Right	Nominal	Input
OC_1_5	Numeric	1	0	How would you describe your relationship to Ocean Conservancy? Select all that apply. - Selected Choice I follow them on social media	{1, I follow them on social media}...	None	8	Right	Nominal	Input
OC_1_6	Numeric	1	0	How would you describe your relationship to Ocean Conservancy? Select all that apply. - Selected Choice Other, describe:	{1, Other, describe:}...	None	8	Right	Nominal	Input
OC_1_6_TEXT	String	479	0	How would you describe your relationship to Ocean Conservancy? Select all that apply. - Other, describe: - Text	None	None	50	Left	Nominal	Input
Q1	Numeric	2	0	State	{1, Alabama}...	None	8	Right	Nominal	Input
Q02	Numeric	2	0	Age	{1, Under 18}...	None	8	Right	Nominal	Input
Q03	Numeric	1	0	Gender - Selected Choice	{1, Man}...	None	8	Right	Nominal	Input
Q03_3_TEXT	String	22	0	Gender - Some other way: - Text	None	None	50	Left	Nominal	Input
Q04	Numeric	1	0	Do you consider yourself Hispanic, Latino/Latina or of Spanish descent?	{1, Yes}...	None	8	Right	Nominal	Input
Q05_1	Numeric	1	0	How do you identify? Select all that apply. - Selected Choice White	{1, White}...	None	8	Right	Nominal	Input
Q05_2	Numeric	1	0	How do you identify? Select all that apply. - Selected Choice Black or African American	{1, Black or African American}...	None	8	Right	Nominal	Input
Q05_3	Numeric	1	0	How do you identify? Select all that apply. - Selected Choice American Indian or Alaska Native	{1, American Indian or Alaska Native}...	None	8	Right	Nominal	Input
Q05_4	Numeric	1	0	How do you identify? Select all that apply. - Selected Choice Asian	{1, Asian}...	None	8	Right	Nominal	Input
Q05_5	Numeric	1	0	How do you identify? Select all that apply. - Selected Choice Native Hawaiian or Other Pacific Islander	{1, Native Hawaiian or Other Pacific Islander}...	None	8	Right	Nominal	Input
Q05_6	Numeric	1	0	How do you identify? Select all that apply. - Selected Choice Other, please specify:	{1, Other, please specify:}...	None	8	Right	Nominal	Input
Q05_7	Numeric	1	0	How do you identify? Select all that apply. - Selected Choice Prefer not to say	{1, Prefer not to say}...	None	8	Right	Nominal	Input
Q05_6_TEXT	String	196	0	How do you identify? Select all that apply. - Other, please specify: - Text	None	None	50	Left	Nominal	Input
Q06	Numeric	1	0	About how often would you say you eat fish or other seafood?	{1, Never}...	None	8	Right	Nominal	Input
Q07	Numeric	1	0	In the last 30 days, have you eaten any type of fish or seafood while out at a restaurant or purchased any type of seafood for home consumption? This can include any type of fish or shellfish.	{1, Yes}...	None	8	Right	Nominal	Input
Q08A_1	Numeric	1	0	In the past 30 days, have you eaten any of the following? Please select all that apply. Salmon (fresh, frozen or canned)	{1, Salmon (fresh, frozen or canned)}...	None	8	Right	Nominal	Input
Q08A_2	Numeric	1	0	In the past 30 days, have you eaten any of the following? Please select all that apply. Tuna (fresh, frozen or canned)	{1, Tuna (fresh, frozen or canned)}...	None	8	Right	Nominal	Input
Q08A_3	Numeric	1	0	In the past 30 days, have you eaten any of the following? Please select all that apply. Shrimp (fresh or frozen)	{1, Shrimp (fresh or frozen)}...	None	8	Right	Nominal	Input
Q08A_4	Numeric	1	0	In the past 30 days, have you eaten any of the following? Please select all that apply. Pollock (fresh or frozen fillet)	{1, Pollock (fresh or frozen fillet)}...	None	8	Right	Nominal	Input
Q08A_5	Numeric	1	0	In the past 30 days, have you eaten any of the following? Please select all that apply. Beef (fresh or frozen cut)	{1, Beef (fresh or frozen cut)}...	None	8	Right	Nominal	Input
Q08A_6	Numeric	1	0	In the past 30 days, have you eaten any of the following? Please select all that apply. Chicken (fresh or frozen cut)	{1, Chicken (fresh or frozen cut)}...	None	8	Right	Nominal	Input
Q08A_7	Numeric	1	0	In the past 30 days, have you eaten any of the following? Please select all that apply. Pork (fresh or frozen cut)	{1, Pork (fresh or frozen cut)}...	None	8	Right	Nominal	Input
Q08A_8	Numeric	1	0	In the past 30 days, have you eaten any of the following? Please select all that apply. Fish sticks	{1, Fish sticks}...	None	8	Right	Nominal	Input
Q08A_9	Numeric	1	0	In the past 30 days, have you eaten any of the following? Please select all that apply. Chicken nuggets	{1, Chicken nuggets}...	None	8	Right	Nominal	Input
Q08A_10	Numeric	1	0	In the past 30 days, have you eaten any of the following? Please select all that apply. Battered shrimp	{1, Battered shrimp}...	None	8	Right	Nominal	Input
Q08A_11	Numeric	1	0	In the past 30 days, have you eaten any of the following? Please select all that apply. Plant protein “chicken” nuggets	{1, Plant protein “chicken” nuggets}...	None	8	Right	Nominal	Input
Q08A_12	Numeric	1	0	In the past 30 days, have you eaten any of the following? Please select all that apply. Plant protein “fish” sticks	{1, Plant protein “fish” sticks}...	None	8	Right	Nominal	Input
Q08A_13	Numeric	1	0	In the past 30 days, have you eaten any of the following? Please select all that apply. Plant protein ground “burger” alternative	{1, Plant protein ground “burger” alternative}...	None	8	Right	Nominal	Input
Q08A_14	Numeric	1	0	In the past 30 days, have you eaten any of the following? Please select all that apply. Tofu (pressed block)	{1, Tofu (pressed block)}...	None	8	Right	Nominal	Input
Q08A_15	Numeric	1	0	In the past 30 days, have you eaten any of the following? Please select all that apply. I have not eaten any of these	{1, I have not eaten any of these}...	None	8	Right	Nominal	Input
A1_Q08	Numeric	40	2	Salmon (fresh, frozen or canned) - In the past 30 days, how many times have you eaten [Field-1]?	None	None	8	Right	Scale	Input
A1_Q08B	Numeric	40	2	Salmon (fresh, frozen or canned) - Using the image above as a guide, what would you estimate is a typical serving size for you, in ounces, when you ate [Field-1] in the last month?	None	None	8	Right	Scale	Input
A2_Q08	Numeric	40	2	Tuna (fresh, frozen or canned) - In the past 30 days, how many times have you eaten [Field-1]?	None	None	8	Right	Scale	Input
A2_Q08B	Numeric	40	2	Tuna (fresh, frozen or canned) - Using the image above as a guide, what would you estimate is a typical serving size for you, in ounces, when you ate [Field-1] in the last month?	None	None	8	Right	Scale	Input
A3_Q08	Numeric	40	2	Shrimp (fresh or frozen) - In the past 30 days, how many times have you eaten [Field-1]?	None	None	8	Right	Scale	Input
A3_Q08B	Numeric	40	2	Shrimp (fresh or frozen) - Using the image above as a guide, what would you estimate is a typical serving size for you, in ounces, when you ate [Field-1] in the last month?	None	None	8	Right	Scale	Input
A4_Q08	Numeric	40	2	Pollock (fresh or frozen fillet) - In the past 30 days, how many times have you eaten [Field-1]?	None	None	8	Right	Scale	Input
A4_Q08B	Numeric	40	2	Pollock (fresh or frozen fillet) - Using the image above as a guide, what would you estimate is a typical serving size for you, in ounces, when you ate [Field-1] in the last month?	None	None	8	Right	Scale	Input
A5_Q08	Numeric	40	2	Beef (fresh or frozen cut) - In the past 30 days, how many times have you eaten [Field-1]?	None	None	8	Right	Scale	Input
A5_Q08B	Numeric	40	2	Beef (fresh or frozen cut) - Using the image above as a guide, what would you estimate is a typical serving size for you, in ounces, when you ate [Field-1] in the last month?	None	None	8	Right	Scale	Input
A6_Q08	Numeric	40	2	Chicken (fresh or frozen cut) - In the past 30 days, how many times have you eaten [Field-1]?	None	None	8	Right	Scale	Input
A6_Q08B	Numeric	40	2	Chicken (fresh or frozen cut) - Using the image above as a guide, what would you estimate is a typical serving size for you, in ounces, when you ate [Field-1] in the last month?	None	None	8	Right	Scale	Input
A7_Q08	Numeric	40	2	Pork (fresh or frozen cut) - In the past 30 days, how many times have you eaten [Field-1]?	None	None	8	Right	Scale	Input
A7_Q08B	Numeric	40	2	Pork (fresh or frozen cut) - Using the image above as a guide, what would you estimate is a typical serving size for you, in ounces, when you ate [Field-1] in the last month?	None	None	8	Right	Scale	Input
A8_Q08	Numeric	40	2	Fish sticks - In the past 30 days, how many times have you eaten [Field-1]?	None	None	8	Right	Scale	Input
A8_Q08B	Numeric	40	2	Fish sticks - Using the image above as a guide, what would you estimate is a typical serving size for you, in ounces, when you ate [Field-1] in the last month?	None	None	8	Right	Scale	Input
A9_Q08	Numeric	40	2	Chicken nuggets - In the past 30 days, how many times have you eaten [Field-1]?	None	None	8	Right	Scale	Input
A9_Q08B	Numeric	40	2	Chicken nuggets - Using the image above as a guide, what would you estimate is a typical serving size for you, in ounces, when you ate [Field-1] in the last month?	None	None	8	Right	Scale	Input
A10_Q08	Numeric	40	2	Battered shrimp - In the past 30 days, how many times have you eaten [Field-1]?	None	None	8	Right	Scale	Input
A10_Q08B	Numeric	40	2	Battered shrimp - Using the image above as a guide, what would you estimate is a typical serving size for you, in ounces, when you ate [Field-1] in the last month?	None	None	8	Right	Scale	Input
A11_Q08	Numeric	40	2	Plant protein “chicken” nuggets - In the past 30 days, how many times have you eaten [Field-1]?	None	None	8	Right	Scale	Input
A11_Q08B	Numeric	40	2	Plant protein “chicken” nuggets - Using the image above as a guide, what would you estimate is a typical serving size for you, in ounces, when you ate [Field-1] in the last month?	None	None	8	Right	Scale	Input
A12_Q08	Numeric	40	2	Plant protein “fish” sticks - In the past 30 days, how many times have you eaten [Field-1]?	None	None	8	Right	Scale	Input
A12_Q08B	Numeric	40	2	Plant protein “fish” sticks - Using the image above as a guide, what would you estimate is a typical serving size for you, in ounces, when you ate [Field-1] in the last month?	None	None	8	Right	Scale	Input
A13_Q08	Numeric	40	2	Plant protein ground “burger” alternative - In the past 30 days, how many times have you eaten [Field-1]?	None	None	8	Right	Scale	Input
A13_Q08B	Numeric	40	2	Plant protein ground “burger” alternative - Using the image above as a guide, what would you estimate is a typical serving size for you, in ounces, when you ate [Field-1] in the last month?	None	None	8	Right	Scale	Input
A14_Q08	Numeric	40	2	Tofu (pressed block) - In the past 30 days, how many times have you eaten [Field-1]?	None	None	8	Right	Scale	Input
A14_Q08B	Numeric	40	2	Tofu (pressed block) - Using the image above as a guide, what would you estimate is a typical serving size for you, in ounces, when you ate [Field-1] in the last month?	None	None	8	Right	Scale	Input
A15_Q08	Numeric	40	2	I have not eaten any of these - In the past 30 days, how many times have you eaten [Field-1]?	None	None	8	Right	Scale	Input
A15_Q08B	Numeric	40	2	I have not eaten any of these - Using the image above as a guide, what would you estimate is a typical serving size for you, in ounces, when you ate [Field-1] in the last month?	None	None	8	Right	Scale	Input
Q09	Numeric	1	0	Thinking about the overall health of the world’s oceans, taking into account water quality, health and abundance of marine life and habitats, how would you rate the health of the world’s oceans today?	{1, Very good health}...	None	8	Right	Nominal	Input
Q10	Numeric	1	0	Compared to other issues you care about, where does concern about the ocean fit?	{1, The most important}...	None	8	Right	Nominal	Input
Q11_1	Numeric	1	0	Below is a list of problems that could impact the ocean or how people interact with the ocean. For each, please tell us if you think it is: - Climate change impacts such as sea level rise, warming water and changes to ocean chemistry	{1, A pressing problem of today}...	None	8	Right	Nominal	Input
Q11_2	Numeric	1	0	Below is a list of problems that could impact the ocean or how people interact with the ocean. For each, please tell us if you think it is: - Decline of sea life populations	{1, A pressing problem of today}...	None	8	Right	Nominal	Input
Q11_3	Numeric	1	0	Below is a list of problems that could impact the ocean or how people interact with the ocean. For each, please tell us if you think it is: - Pollution from nutrients (agricultural waste run-off from the land, sewage, others)	{1, A pressing problem of today}...	None	8	Right	Nominal	Input
Q11_4	Numeric	1	0	Below is a list of problems that could impact the ocean or how people interact with the ocean. For each, please tell us if you think it is: - Pollution from chemicals (flame retardants, heavy metals, PFAS, others)	{1, A pressing problem of today}...	None	8	Right	Nominal	Input
Q11_5	Numeric	1	0	Below is a list of problems that could impact the ocean or how people interact with the ocean. For each, please tell us if you think it is: - Plastic pollution (bottles, bags, packaging and other trash) entering the ocean	{1, A pressing problem of today}...	None	8	Right	Nominal	Input
Q11_6	Numeric	1	0	Below is a list of problems that could impact the ocean or how people interact with the ocean. For each, please tell us if you think it is: - Impacts to the ocean from coastal development and increasing coastal populations	{1, A pressing problem of today}...	None	8	Right	Nominal	Input
Q11_7	Numeric	1	0	Below is a list of problems that could impact the ocean or how people interact with the ocean. For each, please tell us if you think it is: - Too few protected areas to allow ocean species and habitat space to recover and replenish	{1, A pressing problem of today}...	None	8	Right	Nominal	Input
Q11_8	Numeric	1	0	Below is a list of problems that could impact the ocean or how people interact with the ocean. For each, please tell us if you think it is: - Inadequate investment in science to understand the ocean and human impacts	{1, A pressing problem of today}...	None	8	Right	Nominal	Input
Q11_9	Numeric	1	0	Below is a list of problems that could impact the ocean or how people interact with the ocean. For each, please tell us if you think it is: - Oil spills	{1, A pressing problem of today}...	None	8	Right	Nominal	Input
Q12_1_1	Numeric	1	0	You indicated that plastic trash entering the ocean is one of the pressing problems facing the ocean today or will be in the future. What concerns you most about plastic pollution in the ocean? Second most? - Marine animals getting tangled up and injured	{1, Most concerning to me}...	None	8	Right	Nominal	Input
Q12_1_2	Numeric	1	0	You indicated that plastic trash entering the ocean is one of the pressing problems facing the ocean today or will be in the future. What concerns you most about plastic pollution in the ocean? Second most? - Marine animals getting tangled up and injured	{1, 2nd most concerning to me}...	None	8	Right	Nominal	Input
Q12_2_1	Numeric	1	0	You indicated that plastic trash entering the ocean is one of the pressing problems facing the ocean today or will be in the future. What concerns you most about plastic pollution in the ocean? Second most? - Marine animals eating plastic/mistaking it fo	{1, Most concerning to me}...	None	8	Right	Nominal	Input
Q12_2_2	Numeric	1	0	You indicated that plastic trash entering the ocean is one of the pressing problems facing the ocean today or will be in the future. What concerns you most about plastic pollution in the ocean? Second most? - Marine animals eating plastic/mistaking it fo	{1, 2nd most concerning to me}...	None	8	Right	Nominal	Input
Q12_3_1	Numeric	1	0	You indicated that plastic trash entering the ocean is one of the pressing problems facing the ocean today or will be in the future. What concerns you most about plastic pollution in the ocean? Second most? - Plastic breaking down into smaller pieces but	{1, Most concerning to me}...	None	8	Right	Nominal	Input
Q12_3_2	Numeric	1	0	You indicated that plastic trash entering the ocean is one of the pressing problems facing the ocean today or will be in the future. What concerns you most about plastic pollution in the ocean? Second most? - Plastic breaking down into smaller pieces but	{1, 2nd most concerning to me}...	None	8	Right	Nominal	Input
Q12_4_1	Numeric	1	0	You indicated that plastic trash entering the ocean is one of the pressing problems facing the ocean today or will be in the future. What concerns you most about plastic pollution in the ocean? Second most? - Accumulation of massive amounts of plastic in	{1, Most concerning to me}...	None	8	Right	Nominal	Input
Q12_4_2	Numeric	1	0	You indicated that plastic trash entering the ocean is one of the pressing problems facing the ocean today or will be in the future. What concerns you most about plastic pollution in the ocean? Second most? - Accumulation of massive amounts of plastic in	{1, 2nd most concerning to me}...	None	8	Right	Nominal	Input
Q12_5_1	Numeric	1	0	You indicated that plastic trash entering the ocean is one of the pressing problems facing the ocean today or will be in the future. What concerns you most about plastic pollution in the ocean? Second most? - Plastic trash ruins beautiful places and how	{1, Most concerning to me}...	None	8	Right	Nominal	Input
Q12_5_2	Numeric	1	0	You indicated that plastic trash entering the ocean is one of the pressing problems facing the ocean today or will be in the future. What concerns you most about plastic pollution in the ocean? Second most? - Plastic trash ruins beautiful places and how	{1, 2nd most concerning to me}...	None	8	Right	Nominal	Input
Q12_6_1	Numeric	1	0	You indicated that plastic trash entering the ocean is one of the pressing problems facing the ocean today or will be in the future. What concerns you most about plastic pollution in the ocean? Second most? - Plastic contains toxic chemicals which can le	{1, Most concerning to me}...	None	8	Right	Nominal	Input
Q12_6_2	Numeric	1	0	You indicated that plastic trash entering the ocean is one of the pressing problems facing the ocean today or will be in the future. What concerns you most about plastic pollution in the ocean? Second most? - Plastic contains toxic chemicals which can le	{1, 2nd most concerning to me}...	None	8	Right	Nominal	Input
Q12_7_1	Numeric	1	0	You indicated that plastic trash entering the ocean is one of the pressing problems facing the ocean today or will be in the future. What concerns you most about plastic pollution in the ocean? Second most? - It is disrespectful and no way to treat natur	{1, Most concerning to me}...	None	8	Right	Nominal	Input
Q12_7_2	Numeric	1	0	You indicated that plastic trash entering the ocean is one of the pressing problems facing the ocean today or will be in the future. What concerns you most about plastic pollution in the ocean? Second most? - It is disrespectful and no way to treat natur	{1, 2nd most concerning to me}...	None	8	Right	Nominal	Input
Q12_8_1	Numeric	1	0	You indicated that plastic trash entering the ocean is one of the pressing problems facing the ocean today or will be in the future. What concerns you most about plastic pollution in the ocean? Second most? - Human health impacts from consuming microplas	{1, Most concerning to me}...	None	8	Right	Nominal	Input
Q12_8_2	Numeric	1	0	You indicated that plastic trash entering the ocean is one of the pressing problems facing the ocean today or will be in the future. What concerns you most about plastic pollution in the ocean? Second most? - Human health impacts from consuming microplas	{1, 2nd most concerning to me}...	None	8	Right	Nominal	Input
Q12_9_1	Numeric	1	0	You indicated that plastic trash entering the ocean is one of the pressing problems facing the ocean today or will be in the future. What concerns you most about plastic pollution in the ocean? Second most? - Health/sanitation issues involved with human	{1, Most concerning to me}...	None	8	Right	Nominal	Input
Q12_9_2	Numeric	1	0	You indicated that plastic trash entering the ocean is one of the pressing problems facing the ocean today or will be in the future. What concerns you most about plastic pollution in the ocean? Second most? - Health/sanitation issues involved with human	{1, 2nd most concerning to me}...	None	8	Right	Nominal	Input
Q12_10_1	Numeric	1	0	You indicated that plastic trash entering the ocean is one of the pressing problems facing the ocean today or will be in the future. What concerns you most about plastic pollution in the ocean? Second most? - Economic impacts of plastic trash in the ocea	{1, Most concerning to me}...	None	8	Right	Nominal	Input
Q12_10_2	Numeric	1	0	You indicated that plastic trash entering the ocean is one of the pressing problems facing the ocean today or will be in the future. What concerns you most about plastic pollution in the ocean? Second most? - Economic impacts of plastic trash in the ocea	{1, 2nd most concerning to me}...	None	8	Right	Nominal	Input
Q12_11_1	Numeric	1	0	You indicated that plastic trash entering the ocean is one of the pressing problems facing the ocean today or will be in the future. What concerns you most about plastic pollution in the ocean? Second most? - Coastal communities being disproportionately	{1, Most concerning to me}...	None	8	Right	Nominal	Input
Q12_11_2	Numeric	1	0	You indicated that plastic trash entering the ocean is one of the pressing problems facing the ocean today or will be in the future. What concerns you most about plastic pollution in the ocean? Second most? - Coastal communities being disproportionately	{1, 2nd most concerning to me}...	None	8	Right	Nominal	Input
Q12_12_1	Numeric	1	0	You indicated that plastic trash entering the ocean is one of the pressing problems facing the ocean today or will be in the future. What concerns you most about plastic pollution in the ocean? Second most? - Something else [PLEASE EXPLAIN] Most concerni	{1, Most concerning to me}...	None	8	Right	Nominal	Input
Q12_12_2	Numeric	1	0	You indicated that plastic trash entering the ocean is one of the pressing problems facing the ocean today or will be in the future. What concerns you most about plastic pollution in the ocean? Second most? - Something else [PLEASE EXPLAIN] 2nd most conc	{1, 2nd most concerning to me}...	None	8	Right	Nominal	Input
Q12_12_TEXT	String	444	0	You indicated that plastic trash entering the ocean is one of the pressing problems facing the ocean today or will be in the future. What concerns you most about plastic pollution in the ocean? Second most? - Something else [PLEASE EXPLAIN] - Text	None	None	50	Left	Nominal	Input
Q13	Numeric	1	0	Have you ever heard of MICROPLASTICS?	{1, Yes}...	None	8	Right	Nominal	Input
Q14	Numeric	1	0	How familiar are you with MICROPLASTICS?	{1, Very familiar – know a lot}...	None	8	Right	Nominal	Input
Q15	Numeric	1	0	How concerned, if at all, are you about microplastics in the environment?	{1, Very concerned}...	None	8	Right	Nominal	Input
Q16	Numeric	1	0	How concerned if at all, are you about microplastics that humans are exposed to in day-to-day life?	{1, Very concerned}...	None	8	Right	Nominal	Input
Q18	String	646	0	Having read this definition, what if any questions or concerns do you have about microplastics?	None	None	50	Left	Nominal	Input
Q19	Numeric	1	0	Reading this, how concerned, if at all, are you about microplastics?	{1, Very concerned}...	None	8	Right	Nominal	Input
Q20_1	Numeric	1	0	How significant a threat do you think microplastics are to each of the following? - The health of the ocean	{1, Very significant threat}...	None	8	Right	Nominal	Input
Q20_2	Numeric	1	0	How significant a threat do you think microplastics are to each of the following? - The health of ocean animals	{1, Very significant threat}...	None	8	Right	Nominal	Input
Q20_3	Numeric	1	0	How significant a threat do you think microplastics are to each of the following? - The health of freshwater (river, lake, stream) ecosystems	{1, Very significant threat}...	None	8	Right	Nominal	Input
Q20_4	Numeric	1	0	How significant a threat do you think microplastics are to each of the following? - The health of freshwater (river, lake, stream) animals	{1, Very significant threat}...	None	8	Right	Nominal	Input
Q20_5	Numeric	1	0	How significant a threat do you think microplastics are to each of the following? - The health of terrestrial (land) ecosystems	{1, Very significant threat}...	None	8	Right	Nominal	Input
Q20_6	Numeric	1	0	How significant a threat do you think microplastics are to each of the following? - The health of terrestrial (land) animals	{1, Very significant threat}...	None	8	Right	Nominal	Input
Q20_7	Numeric	1	0	How significant a threat do you think microplastics are to each of the following? - Human health	{1, Very significant threat}...	None	8	Right	Nominal	Input
Q21_1	Numeric	1	0	Below are some concerns that have been raised about plastics and microplastics. For each one, how much does it concern you? - Microplastics contain chemical additives and attract other pollutants in the environment, and are often eaten by wildlife.	{1, Very concerning}...	None	8	Right	Nominal	Input
Q21_2	Numeric	1	0	Below are some concerns that have been raised about plastics and microplastics. For each one, how much does it concern you? - Scientists have found microplastics in 1,288 ocean species and at least 277 land-dwelling and freshwater species. Around the wor	{1, Very concerning}...	None	8	Right	Nominal	Input
Q21_3	Numeric	1	0	Below are some concerns that have been raised about plastics and microplastics. For each one, how much does it concern you? - Microplastics have become incorporated into food chains in ecosystems around the world.	{1, Very concerning}...	None	8	Right	Nominal	Input
Q21_4	Numeric	1	0	Below are some concerns that have been raised about plastics and microplastics. For each one, how much does it concern you? - Microplastics are found not only in animals, but have also been found in plants.	{1, Very concerning}...	None	8	Right	Nominal	Input
Q21_5	Numeric	1	0	Below are some concerns that have been raised about plastics and microplastics. For each one, how much does it concern you? - Humans get microplastics in their bodies by breathing in airborne particles and eating them when their food picks up particles fr	{1, Very concerning}...	None	8	Right	Nominal	Input
Q21_6	Numeric	1	0	Below are some concerns that have been raised about plastics and microplastics. For each one, how much does it concern you? - The raw materials for most plastics are created from fossil fuels including oil and natural gas in a process that releases large	{1, Very concerning}...	None	8	Right	Nominal	Input
Q21_7	Numeric	1	0	Below are some concerns that have been raised about plastics and microplastics. For each one, how much does it concern you? - Plastic packaging such as Styrofoam trays, plastic bags and plastic bottles can release microplastics into food and drinks.	{1, Very concerning}...	None	8	Right	Nominal	Input
Q21_8	Numeric	1	0	Below are some concerns that have been raised about plastics and microplastics. For each one, how much does it concern you? - Microplastics are nearly impossible to effectively clean up once they have been released into the environment.	{1, Very concerning}...	None	8	Right	Nominal	Input
Q21_9	Numeric	1	0	Below are some concerns that have been raised about plastics and microplastics. For each one, how much does it concern you? - Communities around the world, especially poorer island countries that depend on wild seafood for their diet, face greater risks t	{1, Very concerning}...	None	8	Right	Nominal	Input
Q22	Numeric	1	0	Having read more, how concerned if at all, are you about microplastics?	{1, Very concerned}...	None	8	Right	Nominal	Input
Q24_1	Numeric	1	0	Below are some actions that could be taken to stop the amount of microplastics entering the environment, water supply and ocean. For each, do you…? - Mandating that microplastic-catching filters be installed in all new washing machines manufactured in the	{1, Strongly support}...	None	8	Right	Nominal	Input
Q24_2	Numeric	1	0	Below are some actions that could be taken to stop the amount of microplastics entering the environment, water supply and ocean. For each, do you…? - Requiring the U.S. Environmental Protection Agency to regulate the discharge of plastic pre-production pe	{1, Strongly support}...	None	8	Right	Nominal	Input
Q24_3	Numeric	1	0	Below are some actions that could be taken to stop the amount of microplastics entering the environment, water supply and ocean. For each, do you…? - Passing the Break Free From Plastic Pollution Act, which would phase out many single-use plastics, pause	{1, Strongly support}...	None	8	Right	Nominal	Input
Q24_4	Numeric	1	0	Below are some actions that could be taken to stop the amount of microplastics entering the environment, water supply and ocean. For each, do you…? - Passage of plastic reduction measures in your city or town including plastic bag bans and requirements fo	{1, Strongly support}...	None	8	Right	Nominal	Input
Q24_5	Numeric	1	0	Below are some actions that could be taken to stop the amount of microplastics entering the environment, water supply and ocean. For each, do you…? - Contributing time or money to campaigns to limit or ban single-use plastics (like straws and plastic uten	{1, Strongly support}...	None	8	Right	Nominal	Input
Q24_6	Numeric	1	0	Below are some actions that could be taken to stop the amount of microplastics entering the environment, water supply and ocean. For each, do you…? - Demand that the government fund a comprehensive assessment of the risks to human health from microplastic	{1, Strongly support}...	None	8	Right	Nominal	Input
Q25_1	Numeric	1	0	Below are some actions you can take personally to reduce your everyday plastic footprint and reduce the likelihood of plastics leaking into the environment. For each, would you…? - Carry a reusable water bottle	{1, Definitely do}...	None	8	Right	Nominal	Input
Q25_2	Numeric	1	0	Below are some actions you can take personally to reduce your everyday plastic footprint and reduce the likelihood of plastics leaking into the environment. For each, would you…? - Bring your own beverage container to be filled at a coffee shop or other e	{1, Definitely do}...	None	8	Right	Nominal	Input
Q25_3	Numeric	1	0	Below are some actions you can take personally to reduce your everyday plastic footprint and reduce the likelihood of plastics leaking into the environment. For each, would you…? - Bring your own food container to a restaurant for food/beverage takeout or	{1, Definitely do}...	None	8	Right	Nominal	Input
Q25_4	Numeric	1	0	Below are some actions you can take personally to reduce your everyday plastic footprint and reduce the likelihood of plastics leaking into the environment. For each, would you…? - Bring your own shopping bag to a store or market	{1, Definitely do}...	None	8	Right	Nominal	Input
Q25_5	Numeric	1	0	Below are some actions you can take personally to reduce your everyday plastic footprint and reduce the likelihood of plastics leaking into the environment. For each, would you…? - Do not use the plastic produce bags generally available in grocery stores	{1, Definitely do}...	None	8	Right	Nominal	Input
Q25_6	Numeric	1	0	Below are some actions you can take personally to reduce your everyday plastic footprint and reduce the likelihood of plastics leaking into the environment. For each, would you…? - Specifically choose items at a store, market or vendor not packaged in pla	{1, Definitely do}...	None	8	Right	Nominal	Input
Q25_7	Numeric	1	0	Below are some actions you can take personally to reduce your everyday plastic footprint and reduce the likelihood of plastics leaking into the environment. For each, would you…? - Specifically choose items at a store, market or vendor that can be recycle	{1, Definitely do}...	None	8	Right	Nominal	Input
Q25_8	Numeric	1	0	Below are some actions you can take personally to reduce your everyday plastic footprint and reduce the likelihood of plastics leaking into the environment. For each, would you…? - Specifically request no straw at restaurants or with food/beverage takeout	{1, Definitely do}...	None	8	Right	Nominal	Input
Q25_9	Numeric	1	0	Below are some actions you can take personally to reduce your everyday plastic footprint and reduce the likelihood of plastics leaking into the environment. For each, would you…? - Carry and use a reusable straw	{1, Definitely do}...	None	8	Right	Nominal	Input
Q25_10	Numeric	1	0	Below are some actions you can take personally to reduce your everyday plastic footprint and reduce the likelihood of plastics leaking into the environment. For each, would you…? - Carry and use your own utensils instead of disposable items provided with	{1, Definitely do}...	None	8	Right	Nominal	Input
Q25_11	Numeric	1	0	Below are some actions you can take personally to reduce your everyday plastic footprint and reduce the likelihood of plastics leaking into the environment. For each, would you…? - Support initiatives to create reusable takeout packaging for restaurants i	{1, Definitely do}...	None	8	Right	Nominal	Input
Q25_12	Numeric	1	0	Below are some actions you can take personally to reduce your everyday plastic footprint and reduce the likelihood of plastics leaking into the environment. For each, would you…? - Participate in cleanups to remove trash from the environment	{1, Definitely do}...	None	8	Right	Nominal	Input
Q25_13	Numeric	1	0	Below are some actions you can take personally to reduce your everyday plastic footprint and reduce the likelihood of plastics leaking into the environment. For each, would you…? - Ensure recyclable plastics go in the recycling bin	{1, Definitely do}...	None	8	Right	Nominal	Input
Q25_14	Numeric	1	0	Below are some actions you can take personally to reduce your everyday plastic footprint and reduce the likelihood of plastics leaking into the environment. For each, would you…? - Contact specific companies/brands and ask them to reduce plastics in their	{1, Definitely do}...	None	8	Right	Nominal	Input
Q25_15	Numeric	1	0	Below are some actions you can take personally to reduce your everyday plastic footprint and reduce the likelihood of plastics leaking into the environment. For each, would you…? - Contact your political representatives and ask them to support measures th	{1, Definitely do}...	None	8	Right	Nominal	Input
Q26	Numeric	1	0	Who do you think has the most responsibility to reduce the use of plastics and prevent microplastic pollution from increasing? Select one.	{1, Plastic industry (raw plastic material producers)}...	None	8	Right	Nominal	Input
Q26A	Numeric	1	0	Who do you think has the second most responsibility to reduce the use of plastics and prevent microplastic pollution from increasing? Select one.	{1, Plastic industry (raw plastic material producers)}...	None	8	Right	Nominal	Input
Q27	Numeric	2	0	What is the highest level of education you have had the opportunity to complete?	{1, Grade school}...	None	8	Right	Nominal	Input
Q28	Numeric	1	0	Are there any children under age 18 currently living in your household?	{1, Yes, kids under 18 in household}...	None	8	Right	Nominal	Input
Q29	Numeric	1	0	When thinking about social issues, do you consider yourself to be…?	{1, Very conservative}...	None	8	Right	Nominal	Input
Q30	Numeric	1	0	Generally speaking, do you think of yourself as a Democrat, a Republican, an independent, or something else?	{1, Strong Democrat}...	None	8	Right	Nominal	Input
Q31	Numeric	1	0	For statistical purposes only, please indicate which of the following categories best represented your total household income in 2020:	{1, Less than $25,000}...	None	8	Right	Nominal	Input
Q32	Numeric	1	0	What is your current employment status?	{1, Employed full-time}...	None	8	Right	Nominal	Input
Q33	Numeric	1	0	How would you describe the area in which you live? - Selected Choice	{1, City of more than 500,000}...	None	8	Right	Nominal	Input
Q33_5_TEXT	String	1	0	How would you describe the area in which you live? - Other, specify: - Text	None	None	50	Left	Nominal	Input
Q34	Numeric	1	0	How far from the ocean or coast do you live?	{1, Within 5 miles}...	None	8	Right	Nominal	Input
Q35	Numeric	1	0	And how frequently do you visit the ocean or coastal areas?	{1, More than once a month}...	None	8	Right	Nominal	Input
Q36	Numeric	1	0	Do you consider yourself a member of or have you made a contribution to any environmental or conservation organizations in the past 12 months?	{1, Yes}...	None	8	Right	Nominal	Input
Q37	Numeric	1	0	In the past 12 months have you contacted an elected representative about an issue of concern to you?	{1, Yes}...	None	8	Right	Nominal	Input
Q38_1	String	5	0	What is your ZIP code? - ZIP	None	None	50	Left	Nominal	Input
psid	String	1	0	psid	None	None	50	Left	Nominal	Input
pid	Numeric	40	2	pid	None	None	8	Right	Scale	Input
clientID	String	1	0	clientID	None	None	50	Left	Nominal	Input
SampleSource	String	11	0	SampleSource	None	None	50	Left	Nominal	Input
Survey_Status	String	4	0	Survey_Status	None	None	50	Left	Nominal	Input
Survey_Version	String	2	0	Survey_Version	None	None	50	Left	Nominal	Input
TermPoint	String	1	0	TermPoint	None	None	50	Left	Nominal	Input
QuotaPoint	String	1	0	QuotaPoint	None	None	50	Left	Nominal	Input
Cheater_Flag	String	1	0	Cheater_Flag	None	None	50	Left	Nominal	Input
Q_CHL	String	9	0	Q_CHL	None	None	50	Left	Nominal	Input
Q_TerminateFlag	String	1	0	Q_TerminateFlag	None	None	50	Left	Nominal	Input
CountryCode	String	2	0	CountryCode	None	None	50	Left	Nominal	Input
s	String	3	0	s	None	None	50	Left	Nominal	Input
record_term	Numeric	40	2	record_term	None	None	8	Right	Scale	Input
sample	String	11	0	sample	None	None	50	Left	Nominal	Input
OriginalResponseId	String	17	0	OriginalResponseId	None	None	50	Left	Nominal	Input
Device_Type	String	7	0	Device Type	None	None	50	Left	Nominal	Input
re_comp	String	1	0	re_comp	None	None	50	Left	Nominal	Input
re_term	String	1	0	re_term	None	None	50	Left	Nominal	Input
re_qfill	String	1	0	re_qfill	None	None	50	Left	Nominal	Input
re_cheater	String	1	0	re_cheater	None	None	50	Left	Nominal	Input
cmpid	String	24	0	cmpid	None	None	50	Left	Nominal	Input
digid	String	36	0	digid	None	None	50	Left	Nominal	Input
panel_test	Numeric	40	2	panel_test	None	None	8	Right	Scale	Input
panel_contact_insert	String	1	0	panel_contact_insert	None	None	50	Left	Nominal	Input
st	String	44	0	st	None	None	50	Left	Nominal	Input
Quota_AgeGender	String	12	0	Quota_AgeGender	None	None	50	Left	Nominal	Input
Quota_Ethnicity	String	8	0	Quota_Ethnicity	None	None	50	Left	Nominal	Input
State	String	20	0	State	None	None	50	Left	Nominal	Input
Region_4	String	9	0	Region 4	None	None	50	Left	Nominal	Input
Region_9	String	18	0	Region 9	None	None	50	Left	Nominal	Input
Q_TotalDuration	Numeric	40	2	Q_TotalDuration	None	None	8	Right	Scale	Input
intlen	Numeric	40	2	intlen	None	None	8	Right	Scale	Input
Q_DataPolicyViolations	String	1	0	Q_DataPolicyViolations	None	None	50	Left	Nominal	Input
Ban1	Numeric	1	0	Total	{1, Total}...	None	8	Right	Nominal	Input
Audience_DV1	Numeric	1	0	OC Members	{0, No}...	None	8	Right	Nominal	Input
Audience_DV2	Numeric	1	0	US Adults	{0, No}...	None	8	Right	Nominal	Input
Audience_DV3	Numeric	1	0	Seafood Consumers	{0, No}...	None	8	Right	Nominal	Input
Q12_Grid_1_Q121	Numeric	1	0	Most concerning to me	{0, No}...	None	8	Right	Nominal	Input
Q12_Grid_1_Q122	Numeric	1	0	2nd most concerning to me	{0, No}...	None	8	Right	Nominal	Input
Q12_Grid_2_Q121	Numeric	1	0	Most concerning to me	{0, No}...	None	8	Right	Nominal	Input
Q12_Grid_2_Q122	Numeric	1	0	2nd most concerning to me	{0, No}...	None	8	Right	Nominal	Input
Q12_Grid_3_Q121	Numeric	1	0	Most concerning to me	{0, No}...	None	8	Right	Nominal	Input
Q12_Grid_3_Q122	Numeric	1	0	2nd most concerning to me	{0, No}...	None	8	Right	Nominal	Input
Q12_Grid_4_Q121	Numeric	1	0	Most concerning to me	{0, No}...	None	8	Right	Nominal	Input
Q12_Grid_4_Q122	Numeric	1	0	2nd most concerning to me	{0, No}...	None	8	Right	Nominal	Input
Q12_Grid_5_Q121	Numeric	1	0	Most concerning to me	{0, No}...	None	8	Right	Nominal	Input
Q12_Grid_5_Q122	Numeric	1	0	2nd most concerning to me	{0, No}...	None	8	Right	Nominal	Input
Q12_Grid_6_Q121	Numeric	1	0	Most concerning to me	{0, No}...	None	8	Right	Nominal	Input
Q12_Grid_6_Q122	Numeric	1	0	2nd most concerning to me	{0, No}...	None	8	Right	Nominal	Input
Q12_Grid_7_Q121	Numeric	1	0	Most concerning to me	{0, No}...	None	8	Right	Nominal	Input
Q12_Grid_7_Q122	Numeric	1	0	2nd most concerning to me	{0, No}...	None	8	Right	Nominal	Input
Q12_Grid_8_Q121	Numeric	1	0	Most concerning to me	{0, No}...	None	8	Right	Nominal	Input
Q12_Grid_8_Q122	Numeric	1	0	2nd most concerning to me	{0, No}...	None	8	Right	Nominal	Input
Q12_Grid_9_Q121	Numeric	1	0	Most concerning to me	{0, No}...	None	8	Right	Nominal	Input
Q12_Grid_9_Q122	Numeric	1	0	2nd most concerning to me	{0, No}...	None	8	Right	Nominal	Input
Q12_Grid_10_Q121	Numeric	1	0	Most concerning to me	{0, No}...	None	8	Right	Nominal	Input
Q12_Grid_10_Q122	Numeric	1	0	2nd most concerning to me	{0, No}...	None	8	Right	Nominal	Input
Q12_Grid_11_Q121	Numeric	1	0	Most concerning to me	{0, No}...	None	8	Right	Nominal	Input
Q12_Grid_11_Q122	Numeric	1	0	2nd most concerning to me	{0, No}...	None	8	Right	Nominal	Input
Q12_Grid_12_Q121	Numeric	1	0	Most concerning to me	{0, No}...	None	8	Right	Nominal	Input
Q12_Grid_12_Q122	Numeric	1	0	2nd most concerning to me	{0, No}...	None	8	Right	Nominal	Input
Ban1_Aud1	Numeric	1	0	OC-Connected	{0, No}...	None	8	Right	Nominal	Input
Ban1_Aud2	Numeric	1	0	US Adults	{0, No}...	None	8	Right	Nominal	Input
Ban1_Aud3	Numeric	1	0	US Adults-Seafood Consumers	{0, No}...	None	8	Right	Nominal	Input
Ban1_Aud4	Numeric	1	0	US Adults-Non-Seafood Consumers	{0, No}...	None	8	Right	Nominal	Input
Ban1_Q671	Numeric	1	0	Few times a year or less	{0, No}...	None	8	Right	Nominal	Input
Ban1_Q672	Numeric	1	0	1-3x per month	{0, No}...	None	8	Right	Nominal	Input
Ban1_Q673	Numeric	1	0	Weekly or more	{0, No}...	None	8	Right	Nominal	Input
Ban1_Q674	Numeric	1	0	Eaten in past 30 days	{0, No}...	None	8	Right	Nominal	Input
Ban2_OC_11	Numeric	1	0	Donor	{0, No}...	None	8	Right	Nominal	Input
Ban2_OC_12	Numeric	1	0	One-time contributor	{0, No}...	None	8	Right	Nominal	Input
Ban2_OC_13	Numeric	1	0	Subscriber/supporter/follower	{0, No}...	None	8	Right	Nominal	Input
Ban2_Q21	Numeric	1	0	<50	{0, No}...	None	8	Right	Nominal	Input
Ban2_Q22	Numeric	1	0	50-59	{0, No}...	None	8	Right	Nominal	Input
Ban2_Q23	Numeric	1	0	60-74	{0, No}...	None	8	Right	Nominal	Input
Ban2_Q24	Numeric	1	0	75+	{0, No}...	None	8	Right	Nominal	Input
Ban2_Q31	Numeric	1	0	Male	{0, No}...	None	8	Right	Nominal	Input
Ban2_Q32	Numeric	1	0	Female	{0, No}...	None	8	Right	Nominal	Input
Ban2_Q451	Numeric	1	0	Person of Color	{0, No}...	None	8	Right	Nominal	Input
Ban2_Q452	Numeric	1	0	White	{0, No}...	None	8	Right	Nominal	Input
Ban2_Q13141	Numeric	1	0	Very	{0, No}...	None	8	Right	Nominal	Input
Ban2_Q13142	Numeric	1	0	Somewhat	{0, No}...	None	8	Right	Nominal	Input
Ban2_Q13143	Numeric	1	0	Heard Name/Not Aware	{0, No}...	None	8	Right	Nominal	Input
Ban2_Q151	Numeric	1	0	Very	{0, No}...	None	8	Right	Nominal	Input
Ban2_Q152	Numeric	1	0	Somewhat	{0, No}...	None	8	Right	Nominal	Input
Ban2_Q153	Numeric	1	0	Concerned	{0, No}...	None	8	Right	Nominal	Input
Ban2_Q154	Numeric	1	0	Neutral/Not	{0, No}...	None	8	Right	Nominal	Input
Ban2_Q161	Numeric	1	0	Very	{0, No}...	None	8	Right	Nominal	Input
Ban2_Q162	Numeric	1	0	Somewhat	{0, No}...	None	8	Right	Nominal	Input
Ban2_Q163	Numeric	1	0	Concerned	{0, No}...	None	8	Right	Nominal	Input
Ban2_Q164	Numeric	1	0	Neutral/Not	{0, No}...	None	8	Right	Nominal	Input
Ban2_Q271	Numeric	1	0	Less than college	{0, No}...	None	8	Right	Nominal	Input
Ban2_Q272	Numeric	1	0	College degree	{0, No}...	None	8	Right	Nominal	Input
Ban2_Q273	Numeric	1	0	Post grad/Professional degre	{0, No}...	None	8	Right	Nominal	Input
Ban2_Q291	Numeric	1	0	Moderate/Conservative	{0, No}...	None	8	Right	Nominal	Input
Ban2_Q292	Numeric	1	0	Liberal	{0, No}...	None	8	Right	Nominal	Input
Ban2_Q293	Numeric	1	0	Other	{0, No}...	None	8	Right	Nominal	Input
Ban2_Q301	Numeric	1	0	Democrat	{0, No}...	None	8	Right	Nominal	Input
Ban2_Q302	Numeric	1	0	Independent	{0, No}...	None	8	Right	Nominal	Input
Ban2_Q303	Numeric	1	0	Republican	{0, No}...	None	8	Right	Nominal	Input
Ban2_Q304	Numeric	1	0	Other	{0, No}...	None	8	Right	Nominal	Input
Ban2_Q341	Numeric	1	0	Within 10mi	{0, No}...	None	8	Right	Nominal	Input
Ban2_Q342	Numeric	1	0	11-20mi	{0, No}...	None	8	Right	Nominal	Input
Ban2_Q343	Numeric	1	0	20-50mi	{0, No}...	None	8	Right	Nominal	Input
Ban2_Q344	Numeric	1	0	50+ miles	{0, No}...	None	8	Right	Nominal	Input
Ban2_Q331	Numeric	1	0	City	{0, No}...	None	8	Right	Nominal	Input
Ban2_Q332	Numeric	1	0	Suburb/small city	{0, No}...	None	8	Right	Nominal	Input
Ban2_Q333	Numeric	1	0	Urban	{0, No}...	None	8	Right	Nominal	Input
Ban2_Q334	Numeric	1	0	Small town/rural	{0, No}...	None	8	Right	Nominal	Input
Ban2_Q351	Numeric	1	0	Monthly or more	{0, No}...	None	8	Right	Nominal	Input
Ban2_Q352	Numeric	1	0	Few times a year	{0, No}...	None	8	Right	Nominal	Input
Ban2_Q353	Numeric	1	0	Once a year	{0, No}...	None	8	Right	Nominal	Input
Ban2_Q354	Numeric	1	0	Seldom/Never	{0, No}...	None	8	Right	Nominal	Input
Ban2_Q36	Numeric	1	0		{1, CONSERVATION DONOR}...	None	8	Right	Nominal	Input
Ban2_Q37	Numeric	1	0		{1, CONTACT ELECTED OFFICIAL}...	None	8	Right	Nominal	Input
Ban3_Q21	Numeric	1	0	<50	{0, No}...	None	8	Right	Nominal	Input
Ban3_Q22	Numeric	1	0	50-59	{0, No}...	None	8	Right	Nominal	Input
Ban3_Q23	Numeric	1	0	60-74	{0, No}...	None	8	Right	Nominal	Input
Ban3_Q24	Numeric	1	0	75+	{0, No}...	None	8	Right	Nominal	Input
Ban3_Q25	Numeric	1	0	<35	{0, No}...	None	8	Right	Nominal	Input
Ban3_Q26	Numeric	1	0	35-49	{0, No}...	None	8	Right	Nominal	Input
Ban3_Q27	Numeric	1	0	50-64	{0, No}...	None	8	Right	Nominal	Input
Ban3_Q28	Numeric	1	0	65+	{0, No}...	None	8	Right	Nominal	Input
Ban3_Q231	Numeric	1	0	Male <35	{0, No}...	None	8	Right	Nominal	Input
Ban3_Q232	Numeric	1	0	Female <35	{0, No}...	None	8	Right	Nominal	Input
Ban3_Q233	Numeric	1	0	Male 35-49	{0, No}...	None	8	Right	Nominal	Input
Ban3_Q234	Numeric	1	0	Female 35-49	{0, No}...	None	8	Right	Nominal	Input
Ban3_Q235	Numeric	1	0	Male 50-64	{0, No}...	None	8	Right	Nominal	Input
Ban3_Q236	Numeric	1	0	Female 50-64	{0, No}...	None	8	Right	Nominal	Input
Ban3_Q237	Numeric	1	0	Male 65+	{0, No}...	None	8	Right	Nominal	Input
Ban3_Q238	Numeric	1	0	Female 65+	{0, No}...	None	8	Right	Nominal	Input
Ban3_Q451	Numeric	1	0	Person of Color	{0, No}...	None	8	Right	Nominal	Input
Ban3_Q452	Numeric	1	0	White	{0, No}...	None	8	Right	Nominal	Input
Ban3_Q453	Numeric	1	0	Hispanic	{0, No}...	None	8	Right	Nominal	Input
Ban3_Q454	Numeric	1	0	Black	{0, No}...	None	8	Right	Nominal	Input
Quota_AgeGender_DV01	Numeric	1	0	Male 18-24	{0, No}...	None	8	Right	Nominal	Input
Quota_AgeGender_DV02	Numeric	1	0	Male 25-34	{0, No}...	None	8	Right	Nominal	Input
Quota_AgeGender_DV03	Numeric	1	0	Male 35-44	{0, No}...	None	8	Right	Nominal	Input
Quota_AgeGender_DV04	Numeric	1	0	Male 45-54	{0, No}...	None	8	Right	Nominal	Input
Quota_AgeGender_DV05	Numeric	1	0	Male 55-64	{0, No}...	None	8	Right	Nominal	Input
Quota_AgeGender_DV06	Numeric	1	0	Male 65+	{0, No}...	None	8	Right	Nominal	Input
Quota_AgeGender_DV07	Numeric	1	0	Female 18-24	{0, No}...	None	8	Right	Nominal	Input
Quota_AgeGender_DV08	Numeric	1	0	Female 25-34	{0, No}...	None	8	Right	Nominal	Input
Quota_AgeGender_DV09	Numeric	1	0	Female 35-44	{0, No}...	None	8	Right	Nominal	Input
Quota_AgeGender_DV10	Numeric	1	0	Female 45-54	{0, No}...	None	8	Right	Nominal	Input
Quota_AgeGender_DV11	Numeric	1	0	Female 55-64	{0, No}...	None	8	Right	Nominal	Input
Quota_AgeGender_DV12	Numeric	1	0	Female 65+	{0, No}...	None	8	Right	Nominal	Input
Quota_AgeGender_DV13	Numeric	1	0	Other	{0, No}...	None	8	Right	Nominal	Input
Region4_DV1	Numeric	1	0	Northeast	{0, No}...	None	8	Right	Nominal	Input
Region4_DV2	Numeric	1	0	Midwest	{0, No}...	None	8	Right	Nominal	Input
Region4_DV3	Numeric	1	0	South	{0, No}...	None	8	Right	Nominal	Input
Region4_DV4	Numeric	1	0	West	{0, No}...	None	8	Right	Nominal	Input
Region9_DV1	Numeric	1	0	East North Central	{0, No}...	None	8	Right	Nominal	Input
Region9_DV2	Numeric	1	0	East South Central	{0, No}...	None	8	Right	Nominal	Input
Region9_DV3	Numeric	1	0	Mid Atlantic	{0, No}...	None	8	Right	Nominal	Input
Region9_DV4	Numeric	1	0	Mountain	{0, No}...	None	8	Right	Nominal	Input
Region9_DV5	Numeric	1	0	New England	{0, No}...	None	8	Right	Nominal	Input
Region9_DV6	Numeric	1	0	Pacific	{0, No}...	None	8	Right	Nominal	Input
Region9_DV7	Numeric	1	0	South Atlantic	{0, No}...	None	8	Right	Nominal	Input
Region9_DV8	Numeric	1	0	West North Central	{0, No}...	None	8	Right	Nominal	Input
Region9_DV9	Numeric	1	0	West South Central	{0, No}...	None	8	Right	Nominal	Input
weight	Numeric	40	2	Weight	None	None	8	Right	Scale	Input
AgeByGender_DV01	Numeric	1	0	Men (18-24)	{0, No}...	None	8	Right	Nominal	Input
AgeByGender_DV02	Numeric	1	0	Women (18-24)	{0, No}...	None	8	Right	Nominal	Input
AgeByGender_DV03	Numeric	1	0	Men (25-34)	{0, No}...	None	8	Right	Nominal	Input
AgeByGender_DV04	Numeric	1	0	Women (25-34)	{0, No}...	None	8	Right	Nominal	Input
AgeByGender_DV05	Numeric	1	0	Men (35-44)	{0, No}...	None	8	Right	Nominal	Input
AgeByGender_DV06	Numeric	1	0	Women (35-44)	{0, No}...	None	8	Right	Nominal	Input
AgeByGender_DV07	Numeric	1	0	Men (45-54)	{0, No}...	None	8	Right	Nominal	Input
AgeByGender_DV08	Numeric	1	0	Women (45-54)	{0, No}...	None	8	Right	Nominal	Input
AgeByGender_DV09	Numeric	1	0	Men (55-64)	{0, No}...	None	8	Right	Nominal	Input
AgeByGender_DV10	Numeric	1	0	Women (55-64)	{0, No}...	None	8	Right	Nominal	Input
AgeByGender_DV11	Numeric	1	0	Men (65+)	{0, No}...	None	8	Right	Nominal	Input
AgeByGender_DV12	Numeric	1	0	Women (65+)	{0, No}...	None	8	Right	Nominal	Input
AgeByGender_DV13	Numeric	1	0	Other Gender	{0, No}...	None	8	Right	Nominal	Input
Quota_Ethnicity_DV1	Numeric	1	0	White alone multi select	{0, No}...	None	8	Right	Nominal	Input
Quota_Ethnicity_DV2	Numeric	1	0	Hispanic (alone or in combo)	{0, No}...	None	8	Right	Nominal	Input
Quota_Ethnicity_DV3	Numeric	1	0	Afri Amer (alone or combined with any other EXCEPT Hispanic	{0, No}...	None	8	Right	Nominal	Input
Quota_Ethnicity_DV4	Numeric	1	0	All Other	{0, No}...	None	8	Right	Nominal	Input
SampleSource_DV1	Numeric	1	0	CLN	{0, No}...	None	8	Right	Nominal	Input
SampleSource_DV2	Numeric	1	0	Full Circle	{0, No}...	None	8	Right	Nominal	Input
SampleSource_DV3	Numeric	1	0	Paradigm	{0, No}...	None	8	Right	Nominal	Input
